# Supplementary material for: Living with Contamination: Insights into an Epigeic Macrofaunal Community in an Area Extremely Polluted by Risk Elements
Source: MDPI journal article supplement (doi:10.3390/su15054243), 2023-02-27
Supplement: s1 [file s1]

**Table S1.** Total number of ants captured at each location, sorted by abundance in descending order.

| Species                      | Total Number of Captured Ants at Each Location |    |    |    |    |
|------------------------------|------------------------------------------------|----|----|----|----|
|                              | 1                                              | 2  | 3  | 4  | 5  |
| <i>Myrmica sabuleti</i>      | 217                                            | 0  | 0  | 0  | 21 |
| <i>Lasius niger</i>          | 2                                              | 27 | 87 | 13 | 49 |
| <i>Myrmica rubra</i>         | 0                                              | 2  | 0  | 56 | 25 |
| <i>Formica pratensis</i>     | 0                                              | 0  | 0  | 74 | 0  |
| <i>Myrmica scabrinodis</i>   | 18                                             | 19 | 4  | 0  | 13 |
| <i>Formica cunicularia</i>   | 0                                              | 8  | 8  | 4  | 32 |
| <i>Formica fusca</i>         | 0                                              | 6  | 22 | 12 | 13 |
| <i>Tetramorium sp.</i>       | 0                                              | 1  | 38 | 12 | 2  |
| <i>Myrmica rugulosa</i>      | 0                                              | 0  | 48 | 0  | 0  |
| <i>Lasius platythorax</i>    | 13                                             | 0  | 2  | 1  | 1  |
| <i>Lasius umbratus</i>       | 3                                              | 4  | 3  | 1  | 1  |
| <i>Myrmica ruginodis</i>     | 11                                             | 1  | 0  | 0  | 0  |
| <i>Camponotus ligniperda</i> | 0                                              | 7  | 2  | 0  | 0  |
| <i>Formica rufibarbis</i>    | 0                                              | 0  | 0  | 7  | 0  |
| <i>Lasius fuliginosus</i>    | 0                                              | 0  | 6  | 0  | 0  |
| <i>Myrmica schencki</i>      | 0                                              | 2  | 0  | 1  | 3  |

**Table S2:** Total number of beetles captured per locality by abundance in descending order

| Species                        | Family        | Locality (pcs of captured insects) |    |    |    |     |
|--------------------------------|---------------|------------------------------------|----|----|----|-----|
|                                |               | 1                                  | 2  | 3  | 4  | 5   |
| <i>Philonthus decorus</i>      | Staphylinidae | 331                                | 1  | 1  | 12 | 74  |
| <i>Silpha obscura</i>          | Silphidae     | 57                                 | 0  | 0  | 0  | 146 |
| <i>Pterostichus melanarius</i> | Carabidae     | 65                                 | 7  | 9  | 3  | 9   |
| <i>Poecilus cupreus</i>        | Carabidae     | 33                                 | 3  | 3  | 3  | 49  |
| <i>Trypocopris vernalis</i>    | Geotrupidae   | 2                                  | 0  | 6  | 0  | 51  |
| <i>Oodes helopioides</i>       | Carabidae     | 37                                 | 10 | 0  | 0  | 3   |
| <i>Amara aenea</i>             | Carabidae     | 20                                 | 3  | 18 | 1  | 0   |
| <i>Otiorhynchus sulcatus</i>   | Curculionidae | 0                                  | 8  | 18 | 6  | 3   |
| <i>Philonthus sp.1</i>         | Staphylinidae | 2                                  | 16 | 0  | 4  | 0   |
| <i>Europhilus fuliginosus</i>  | Carabidae     | 17                                 | 2  | 1  | 1  | 0   |
| <i>Medon sp.</i>               | Staphylinidae | 0                                  | 3  | 11 | 4  | 0   |
| <i>Pterostichus nigrata</i>    | Carabidae     | 9                                  | 1  | 0  | 2  | 1   |
| <i>Agriotes sputator</i>       | Elateridae    | 0                                  | 0  | 0  | 12 | 0   |
| <i>Harpalus latus</i>          | Carabidae     | 1                                  | 2  | 1  | 5  | 3   |
| <i>Philonthus sp.2</i>         | Staphylinidae | 3                                  | 5  | 2  | 0  | 0   |
| <i>Harpalus ruficeps</i>       | Carabidae     | 0                                  | 5  | 1  | 3  | 0   |
| <i>Harpalus aeneus</i>         | Carabidae     | 5                                  | 0  | 3  | 0  | 0   |
| <i>Agrypnus murinus</i>        | Elateridae    | 0                                  | 5  | 0  | 1  | 1   |
| <i>Carabus hortensis</i>       | Carabidae     | 0                                  | 0  | 3  | 0  | 4   |
| <i>Carabus scabriusculus</i>   | Carabidae     | 0                                  | 2  | 0  | 0  | 4   |
| <i>Carabus granulatus</i>      | Carabidae     | 4                                  | 0  | 0  | 0  | 1   |

**Table S3:** Total number of spiders and harvestmen captured per locality, sorted by abundance in descending order.

| Species                              | Family         | Locality (pcs of captured insects) |    |    |    |    |
|--------------------------------------|----------------|------------------------------------|----|----|----|----|
|                                      |                | 1                                  | 2  | 3  | 4  | 5  |
| Aranae                               |                |                                    |    |    |    |    |
| <i>Piratula latitans</i>             | Lycosidae      | 47                                 | 4  | 0  | 0  | 36 |
| <i>Pardosa lugubris</i>              | Lycosidae      | 20                                 | 4  | 15 | 16 | 22 |
| <i>Piratula hygrophila</i>           | Lycosidae      | 22                                 | 3  | 1  | 10 | 31 |
| <i>Pardosa prativaga</i>             | Lycosidae      | 30                                 | 3  | 1  | 1  | 29 |
| <i>Pardosa pullata</i>               | Lycosidae      | 25                                 | 3  | 8  | 8  | 18 |
| <i>Diplostyla concolor</i>           | Lycosidae      | 9                                  | 3  | 5  | 5  | 16 |
| <i>Trochosa terricola</i>            | Lycosidae      | 0                                  | 3  | 5  | 6  | 0  |
| <i>Harpactea rubicunda</i>           | Dysderidae     | 0                                  | 1  | 3  | 0  | 8  |
| <i>Diplocephalus picinus</i>         | Linyphiidae    | 0                                  | 4  | 2  | 4  | 1  |
| <i>Titanoeca quadriguttata</i>       | Titanoecidae   | 0                                  | 3  | 1  | 6  | 0  |
| <i>Pelecopsis radiculicola</i>       | Linyphiidae    | 0                                  | 0  | 2  | 4  | 3  |
| <i>Micrargus herbigradus</i>         | Linyphiidae    | 0                                  | 1  | 3  | 4  | 0  |
| <i>Walckenaeria atrotibialis</i>     | Linyphiidae    | 2                                  | 0  | 1  | 4  | 1  |
| <i>Pocadicnemis juncea</i>           | Linyphiidae    | 0                                  | 0  | 7  | 0  | 0  |
| <i>Tenuiphantes mengei</i>           | Linyphiidae    | 0                                  | 0  | 4  | 3  | 0  |
| <i>Aulonia albimana</i>              | Lycosidae      | 0                                  | 0  | 7  | 0  | 0  |
| <i>Zora spinimana</i>                | Zoridae        | 1                                  | 2  | 0  | 4  | 0  |
| <i>Phrurolithus festivus</i>         | Phrurolithidae | 0                                  | 0  | 5  | 2  | 0  |
| <i>Bathypantes parvulus</i>          | Linyphiidae    | 2                                  | 0  | 2  | 0  | 2  |
| <i>Palliduphantes alutacius</i>      | Linyphiidae    | 0                                  | 0  | 1  | 3  | 2  |
| <i>Xysticus cristatus</i>            | Thomisidae     | 0                                  | 3  | 0  | 2  | 0  |
| <i>Xysticus erraticus</i>            | Thomisidae     | 0                                  | 3  | 0  | 2  | 0  |
| <i>Tibellus oblongus</i>             | Philodromidae  | 0                                  | 2  | 0  | 1  | 2  |
| <i>Pachygnatha degeeri</i>           | Tetragnathidae | 0                                  | 0  | 1  | 0  | 3  |
| <i>Ozyptila trux</i>                 | Thomisidae     | 1                                  | 2  | 0  | 1  | 0  |
| <i>Drassyllus lutetianus</i>         | Gnaphosidae    | 1                                  | 2  | 0  | 0  | 1  |
| <i>Drassyllus praeficus</i>          | Gnaphosidae    | 0                                  | 3  | 0  | 0  | 1  |
| <i>Micaria fulgens</i>               | Gnaphosidae    | 0                                  | 0  | 3  | 0  | 0  |
| Opilliones                           |                |                                    |    |    |    |    |
| <i>Lacinius ephippiatus</i>          | Phalangiidae   | 3                                  | 20 | 0  | 27 | 3  |
| <i>Paranemastoma quadripunctatum</i> | Nemastomatidae | 3                                  | 6  | 9  | 10 | 4  |
| <i>Rilaena triangularis</i>          | Phalangiidae   | 6                                  | 0  | 0  | 0  | 5  |
